# Supplementary material
Source: Springer Nature journal article supplement (https://www.springermedizin.de/resource/supplementary/12936_2008_664_MOESM2_ESM.pdf/9547950)

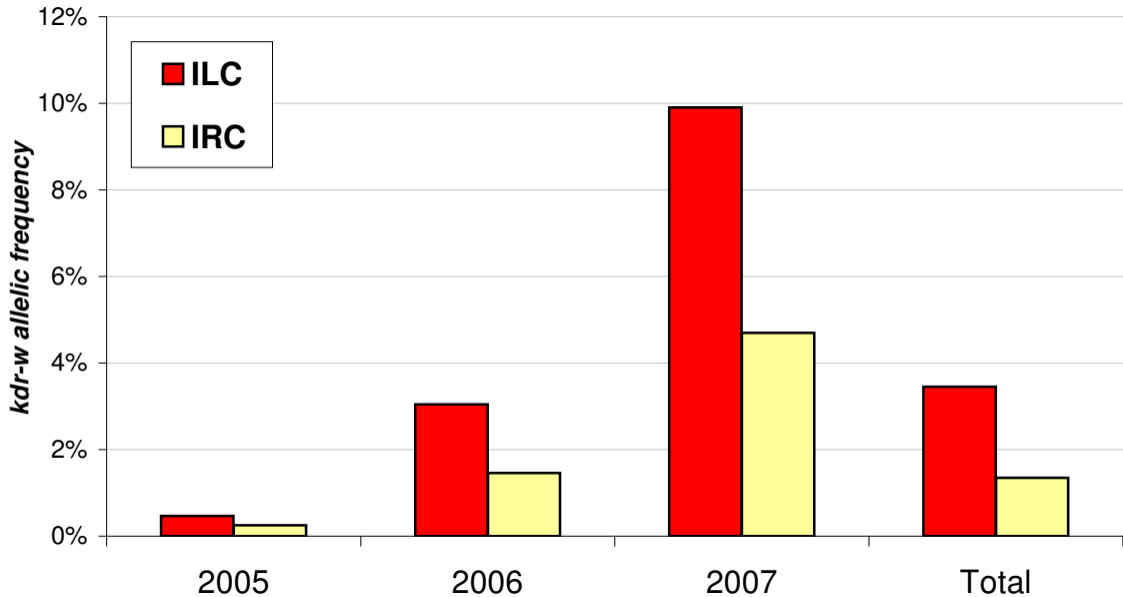

Supplement: MOESM2 [file 9547950]
